# Supplementary material
Source: PubMed Central journal article supplement (PMC11386628)
Supplement: PBI-18-655-s001.pdf [file PBI-18-655-s001.pdf]

Supporting Table 1. PVY dependent HR in *N. benthamiana* plants expressing *contig 630*

| Virus          | <i>A. tumefaciens/c630</i> | <i>A. tumefaciens/ -</i> |
|----------------|----------------------------|--------------------------|
| O (LW)         | ++                         | –                        |
| N (Ny)         | ++                         | –                        |
| N-Wilga        | ++                         | –                        |
| NTN (Slovenia) | ++                         | –                        |
| PVX (O strain) | –                          | –                        |
| TMV (U1)       | –                          | –                        |

The fully developed leaves of *N. benthamiana* plants were inoculated with a suspension of *A. tumefaciens* carrying pICSLUS0003-*c630*, or with *A. tumefaciens* without any plasmid as a control. Two weeks before the *Agrobacterium* infiltration the plants were infected with four different isolates of PVY(O, N, N-Wilga and NTN), PVA or other viruses as a control. Description: -no HR, +/- -weak HR, + HR, ++ strong HR (72 hpi). Experiment was repeated three times.

Supporting Table 2. ELISA titers of PVY in transgenic *35S::Ry<sub>sto</sub>* *S. tuberosum* cv. Maris Piper plants.

| Genotype         | A <sub>405</sub> values <sup>a</sup> |
|------------------|--------------------------------------|
| Maris Piper MOCK | 0,035±003                            |
| Maris Piper PVY  | 1,957±0,22                           |
| MP_630_A         | 0,016±0,017                          |
| MP_630_B         | 0,010±0,004                          |
| MP_630_C         | 0,005±0,001                          |
| MP_630_D         | 0,004±0,002                          |
| MP_630_E         | 0,009±0,003                          |
| MP_630_F         | 1,713±0,093                          |
| MP_630_G         | 0,013±0,003                          |
| MP_630_H         | 1,896±0,188                          |
| MP_630_I         | 0,030±0,029                          |
| MP_630_J         | 0,011±0,001                          |
| MP_630_K         | 0,022±0,007                          |
| MP_630_L         | 0,015±0,009                          |

<sup>a</sup>Mean ELISA absorbance values ± standard errors for three plants each. The plants were tested 3 weeks after inoculation with PVY<sup>NTN</sup>. ELISA readings were taken after 2 h of incubation with substrate at room temperature as described by Syller (1991).

Supporting Table 3. ELISA titers of PVY in transgenic 35S::Ry<sub>sto</sub> *S. tuberosum* cv. Russet Burbank plants.

| Genotype            | A <sub>405</sub> values <sup>a</sup> |
|---------------------|--------------------------------------|
| Russet Burbank MOCK | 0,046 ±0,002                         |
| Russet Burbank PVY  | 2,495±0,181                          |
| RB_630_A            | 0,006±0,000                          |
| RB_630_B            | 0,005±0,001                          |
| RB_630_C            | 0,005±0,001                          |
| RB_630_D            | 0,004±0,002                          |

<sup>a</sup>Mean ELISA absorbance values ± standard errors for three plants each. The plants were tested 3 weeks after inoculation with PVY. ELISA readings were taken after 2 h of incubation with substrate at room temperature as described by Syller (1991).

Supporting Table 4. ELISA titers of PVY in grafted transgenic 35S::Ry<sub>sto</sub> *S. tuberosum* cv. Maris Piper plants.

| Genotype     | A <sub>405</sub> values <sup>a</sup> |
|--------------|--------------------------------------|
| Nicola* MOCK | 0,046 ±0,002                         |
| Nicola* PVY  | 3,303±0.278                          |
| MP_630_A     | 0,005±0,001                          |
| MP_630_N     | 0,005±0,0002                         |
| MP_630_R     | 0,005±0,001                          |

\* PVY-susceptible potato cultivar

<sup>a</sup>Mean ELISA absorbance values ± standard errors for three plants each. The plants were tested 3 weeks after inoculation with PVY. ELISA readings were taken after 2 h of incubation with substrate at room temperature as described by Syller (1991)

Supporting Table 5. Primers used to clone candidate *Ry<sub>sto</sub>* genes

| Gene   | Primer         | Sequence                                            |
|--------|----------------|-----------------------------------------------------|
| c1241  | 124_1_35S_F    | <b>GGCTTAAU</b> CTTTAGCAATATTCTTCAACAATG            |
|        | 124_1_35S_R    | <b>GGTTTAAU</b> TGACTGACATATGGTTCGTATATATC          |
| c124_2 | 122_1_35S_F    | <b>GGCTTAAU</b> GAGAAGTTACCTGTTAGTCTTTAG            |
|        | 124_2_35S_R    | <b>GGTTTAAU</b> AACATATTCTTTCCATACCATTTTATGATAC     |
| c359   | 359_35S_F      | <b>GGCTTAAU</b> CTGTTAGTCTTTAGCAATATTCTTCAACAATGG   |
|        | 359_35S_R      | <b>GGTTTAAU</b> CATGTTTGGTTGAATACAAAATTTAAGAAAGAC   |
| c516   | 516_35S_F      | <b>GGCTTAAU</b> CCTCTTGCAGAAGCATTATAGATTCT          |
|        | 516_35S_R      | <b>GGTTTAAU</b> TGTCACGCTAAGGAGATTAATTTCTC          |
| c535   | 535_35S_F      | <b>GGCTTAAU</b> GGGTCTTCATTGCTGATAAAAATTCTG         |
|        | 535_35S_R      | <b>GGTTTAAU</b> GTGACTTAACACTTAATTTGAGTGTAAATATTTTC |
| c630   | 630_35S_F      | <b>GGCTTAAU</b> GGTGCTAAGAAGACTTCATATCAG            |
|        | 630_35S_R      | <b>GGTTTAAU</b> GGATACTCAACGTATCTACCTTATTATAA       |
| c660   | 660_35S_F      | <b>GGCTTAAU</b> GTATTGACTTGTCACTTGTTAATTC           |
|        | 660_35S_R      | <b>GGTTTAAU</b> GGGATGAGGCTGAGTGCCTCAAG             |
| c692   | 692_35S_F      | <b>GGCTTAAU</b> CTGTTAGTCTTTAGCAATATTCTTCAACAATGG   |
|        | 692_35S_R      | <b>GGTTTAAU</b> CATGTTTGGTTGAATACAAAATTTAAGAAAGAA   |
| c908   | 908_35S_F      | <b>GGCTTAAU</b> CAAGGACTTTATGCATTGAACTTCATTCA       |
|        | 908_35S_R      | <b>GGTTTAAU</b> GTTCAACATGGATTCAATGTTACTCAATAC      |
| c999   | 999_35S_F      | <b>GGCTTAAU</b> ACGCCTAAATCTCCCTGAATAGTCTATT        |
|        | 999_35S_R      | <b>GGTTTAAU</b> GCAGATGAAGTAACTAATGACAATTATAGTAT    |
| c1459  | 1459_35S_F     | <b>GGCTTAAU</b> GCAGAAGCATCACAGATTCTTTTAGTC         |
|        | 1459_35S_R     | <b>GGTTTAAU</b> GACAACAACCTTTACCGTTACGTCAAAG        |
| c630N  | 630_genomic_F1 | <b>GGCTTAAU</b> CCAGGAAAACCTCGTCCATCAA              |
|        | 630_genomic_R1 | <b>AGCGTACTCUT</b> CCCCGTATGAC ATT TTC TCC          |
|        | 630_genomic_F2 | <b>AGAGTACGCU</b> AACAGCAGAATATGGCTTCC              |
|        | 630_genomic_R2 | <b>GGTTTAAU</b> GGGCCAGAGAAAAAGTTGAGCAATCATC        |

In bold - extension for USER cloning

Normal font - gene specific sequence

35S - primers to clone gene into expression vector under 35S promoter and OCS terminator

genomic - primers to clone gene into expression vector under the control of native regulatory elements.

Supporting Table 6. Primer sequences for quantitative RT and qRT-PCR

| Gene    | Primer           | Sequence                     |
|---------|------------------|------------------------------|
| 124_1   | qPCR_124_1_35S_F | GCGAGCGATACTGCAATCTC         |
|         | qPCR_124_1_35S_R | ATCCTCAGGAAGTCCACTCAATATG    |
| c124_2  | qPCR_124_1_35S_F | GCGAGCAAAACTGCAATATACCA      |
|         | qPCR_124_2_35S_R | GATGCAAGACAAAACCTTGAGGAATGT  |
| c359    | qPCR_359_35S_F   | CGCACTTTTTAAAGATGATGAGCG     |
|         | qPCR_359_35S_R   | GGTGTTTAGAGGAGCTTGCACACATC   |
| c516    | qPCR_516_35S_F   | GCTCACTTTGAAGAATGGTCTG       |
|         | qPCR_516_35S_R   | TCTCCTTAAGAAATTTGCAATCCC     |
| c535    | qPCR_535_35S_F   | TGTCTGCGTGGAATCTCTTG         |
|         | qPCR_535_35S_R   | CTACATCGAGCGTCGATAAGC        |
| c630    | qPCR_630_35S_F   | ATGCTTTCAAAGACGATGAGCGGT     |
|         | qPCR_630_35S_R   | ATCTTTGCATTTTTCTCATGTTGGG    |
| c660    | qPCR_660_35S_F   | CTTGGCAAACGTGGATGTTAAG       |
|         | qPCR_660_35S_R   | CTCGTAAGGAGGATAAACCTGATATT   |
| c692    | qPCR_692_35S_F   | GCAAGTCTGACCCTGAAAGA         |
|         | qPCR_692_35S_R   | GGCACAACAAGTGAAAGGATAC       |
| c908    | qPCR_908_35S_F   | CTGATATCTCTTCTCTGAAGTCCA     |
|         | qPCR_908_35S_R   | GTTATTCTCTCTGGTGATAAAGACCT   |
| c1459   | qPCR_1459_35S_F  | GAAGAGGAGTTCTCATGGTAAG       |
|         | qPCR_1459_35S_R  | GAAGACGGATTGGCATTGATCC       |
| EF1     | qpcr_EF1_F       | GACAAGCGTGTTATTGAGAGG        |
|         | qPCR_EF1_R       | CACAGTGCAGTAGTACTTAGTG       |
| L23     | qPCR_L23_F       | AAGGATGCCGTGAAGATGT          |
|         | qPCR_L23_R       | GCATCGTAGTGGAGTCAAC          |
| Sec3    | qPCR_Sec3_F      | GCTTGACACGCCATATCAAT         |
|         | qPCR_Sec3_R      | TGGATTTTACCACCTTCCGCA        |
| PVY_uni | qPCR_PVY_F       | CATAGGAGAACCTGAGATGCCAACT    |
|         | qPCR_PVY_R       | TGGCGAGGTTCCATTTTCA          |
| EDS1    | RT_PCR_EDS1_F    | CGATGAATTTAGCCCTGAATGACTTAGG |
|         | RT_PCR_EDS1_R    | TCACACTTGGTCTGGTACTCCTGTA    |
| NRG1    | RT_PCR_NRG1_F    | GTTCTCTGCTCAATCTTAAGAGAATCAG |
|         | RT_PCR_NRG1_R    | GATCACATGTTTCAGCTGGTACTTCC   |
