# Supplementary material
Source: PubMed Central journal article supplement (PMC11386628)
Supplement: PBI-18-655-s002.pdf [file PBI-18-655-s002.pdf]

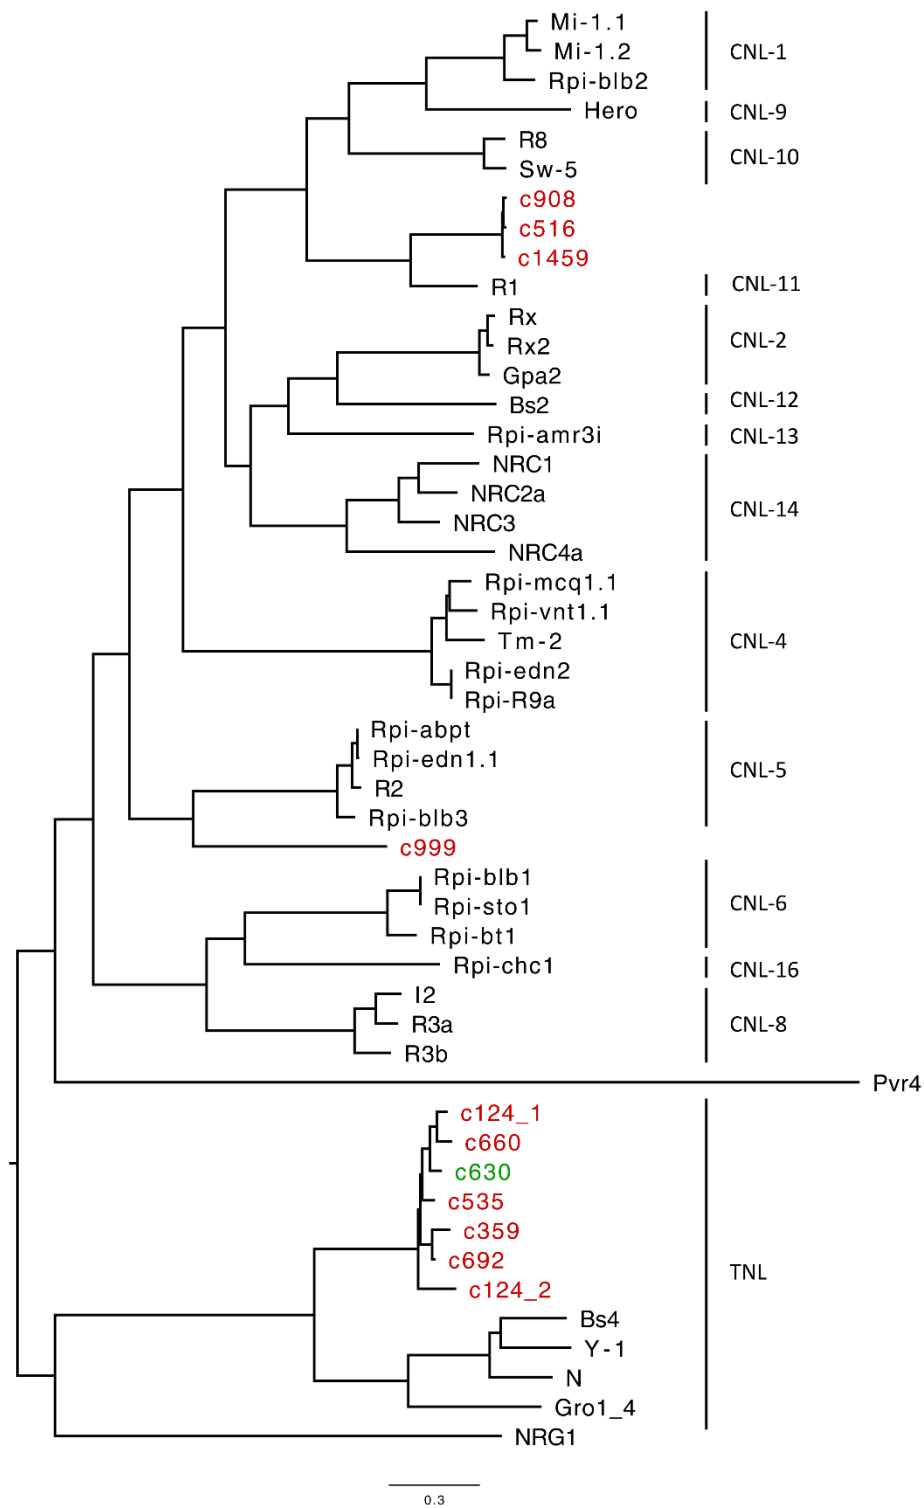

**Supporting Figure 1** Phylogenetic analysis of *Rysto* candidate genes and other functional *Solanaceae* NLRs. Full-length amino acid sequences were aligned using ClustalW 1.74. Evolutionary analyses were conducted using MEGA6.06 using the Maximum-Likelihood statistical method with 100 bootstraps and Poisson (G+I) model for amino acid substitutions.

Tree represents typical Solanaceae NLR architecture. Clades are named according to Andolfo *et al.* (2014) and Witek *et al.* (2016). Candidate contigs are highlighted in red (c630) and green (all remaining). Sequences of functional NLRs were retrieved from public databases; Mi-1.1: AF039681, Mi-1.2: AF039682, Rpi-blb2: DQ122125, Hero: AX337980, R8: ANJ02805, Sw-5: AY007366, R1: AF447489, Rx: AJ011801, Rx2: CAB56299, Gpa2: AAF04603, Bs2: AF202179, Rpi-amr3i: KT373889, NRC1: DQ304484, NRC2a: KT936525, NRC3: XM\_004238900, NRC4a: Solyc04g007030, Rpi-mcq1.1: WO2009013468, Rpi-vnt1.1: FJ423044, Tm-2: AY742887, Rpi-edn2: MI377464, Rpi-R9a: AVX67693, Rpi-abpt: FJ536324, Rpi-edn1.1: GU563963, R2: FJ536325, Rpi-blb3: FJ536326, Rpi-blb1: FB764493, Rpi-sto1: EU884421, Rpi-bt1: FJ188415, Rpi-chc1: WO2011034433, I2: AF118127, R3a: AY849382, R3b: JF900492, Pvr4: KT359375, Bs4: AY438027, Y-1: CAC82812, N: Q40392, Gro1-4: AAP44390 and NRG1: AAY54606.

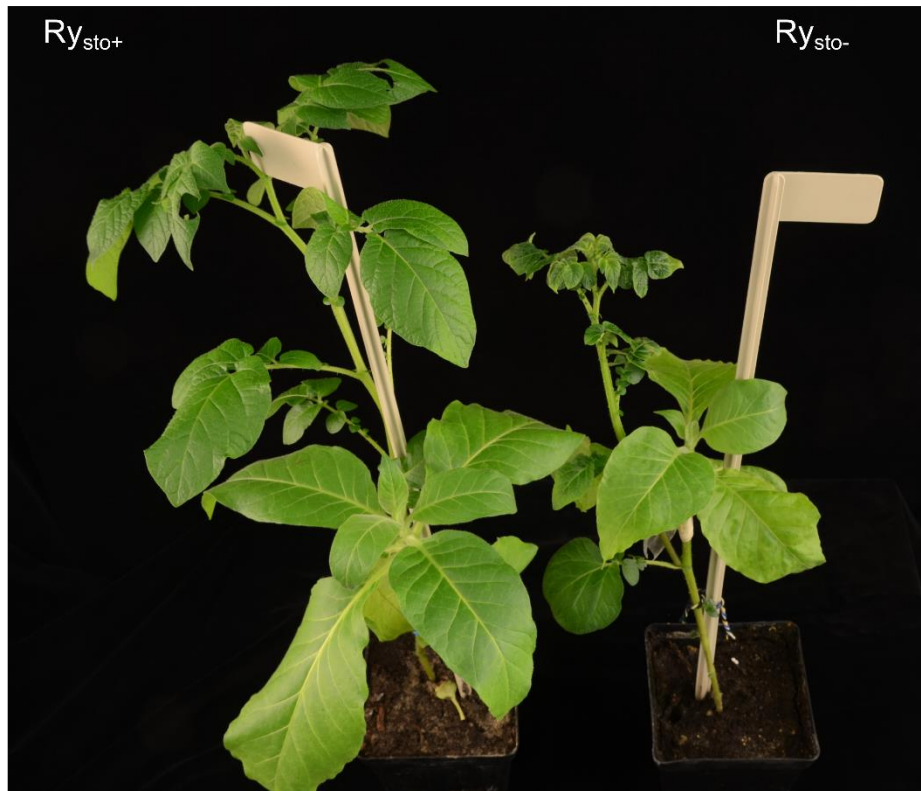

**Supporting Figure 2** Grafted transgenic *Ry<sub>sto</sub>* plants display resistance to PVY. Scions (upper part) of a non-transformed *N. tabacum* plants that had been preinoculated with PVY<sup>NTN</sup> were grafted to a stock (lower part) of stable transgenic 35S:*Ry<sub>sto</sub>* Maris Piper or susceptible to PVY Nicola plants. Three weeks after grafting chlorosis and dwarfing were observed only in susceptible plants (right) whereas *Ry<sub>sto</sub>* transgenic plants (left) remained symptomless. The experiment was performed on three independent transgenic potato lines and three biological replicates were used for each line. Picture was taken 4 weeks after grafting.

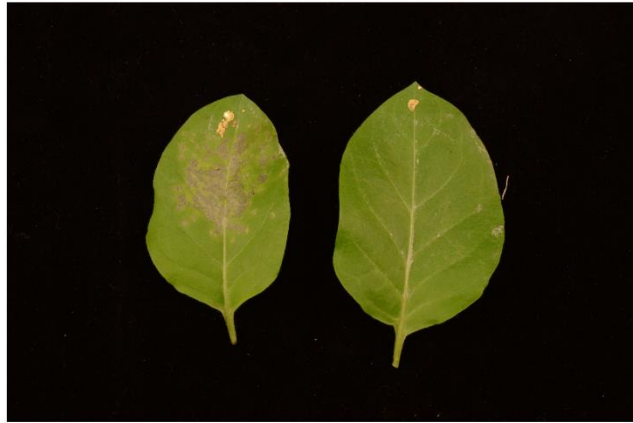

**Supporting Figure 3** HR of transgenic *N. tabacum* expressing *Ry<sub>sto</sub>*. HR response after PVY inoculation in stable transgenic *N. tabacum* plants transformed with *35S:Ry<sub>sto</sub>*. Seven-week-old *N. tabacum* *35S* transgenic and non-transformed plants were inoculated with PVY<sup>NTN</sup>. HR was observed on *N. tabacum* *35S:Ry<sub>sto</sub>* inoculated leaves at 3 dpi, whereas control plants remained symptomless. Image was taken at 7 dpi.

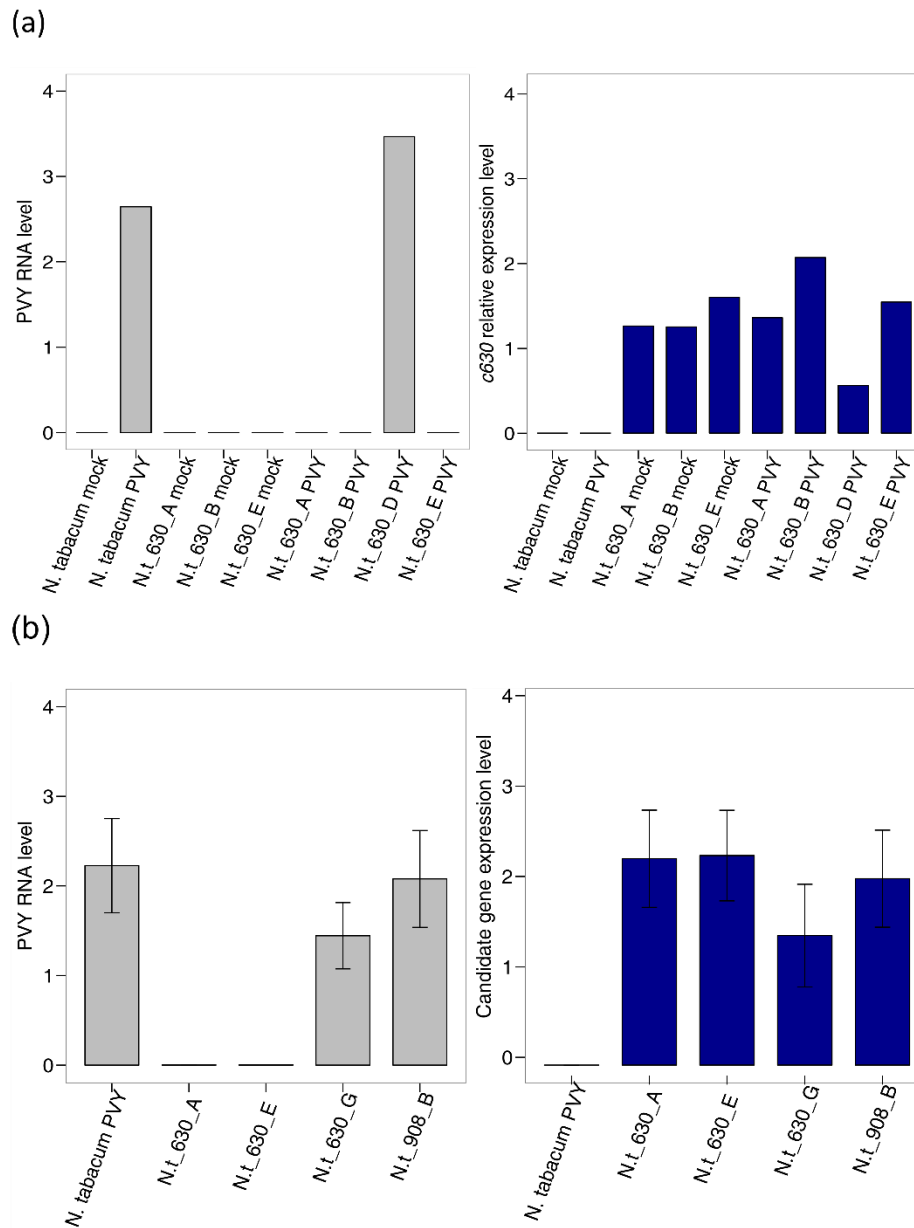

**Supporting Figure 4** Stable transgenic tobacco plants carrying  $Ry_{sto}$  under the control of a 35S promoter display resistance to PVY. Seven-week-old *N. tabacum* 35S: $Ry_{sto}$  transgenic and non-transformed plants were inoculated with PVY<sup>NTN</sup> or mock treated with water. Two weeks after PVY inoculation, mRNA was isolated from upper, non-inoculated leaves and quantified with qPCR. (a) Elevated expression of  $Ry_{sto}$  correlated with lack of PVY RNA (lines A, B and E) in stable T0 transgenic plants. (b) Resistant lines A and E (T1 generation) confirmed T0 observations. Line 630G (susceptible), where expression of  $Ry_{sto}$  was not

detected, had PVY RNA levels similar to a control line (*c908B*) carrying a non-functional paralogue.

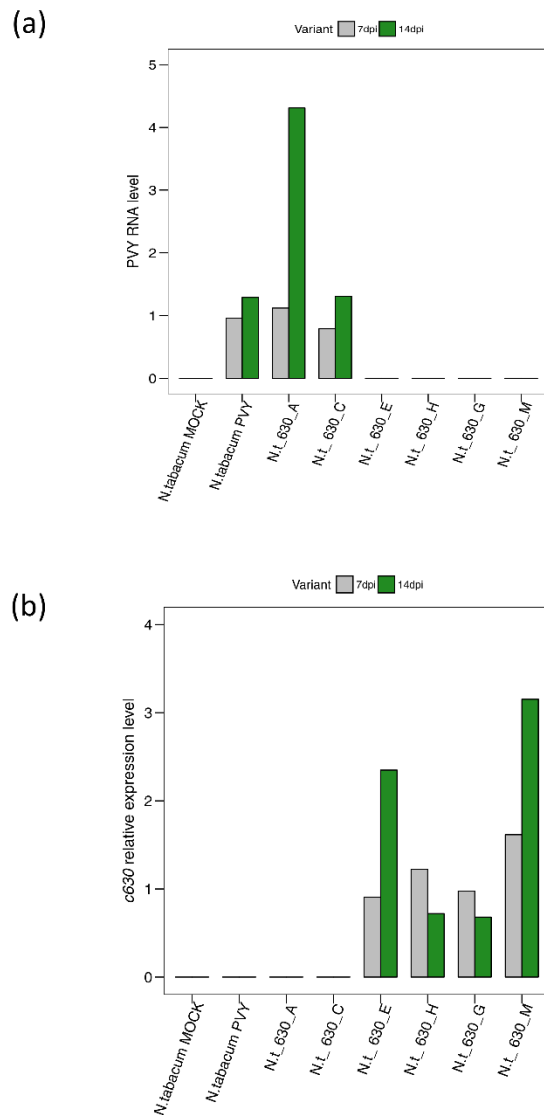

**Supporting Figure 5** Stable transgenic tobacco plants carrying  $Ry_{sto}$  under the control of native regulatory elements display resistance to PVY. Seven-week-old *N. tabacum*  $Ry_{sto}$  (native) transgenic and non-transformed plants were inoculated with PVY<sup>NTN</sup>. Seven and fourteen days after PVY inoculation, mRNA was isolated from upper, non-inoculated leaves and measured using qPCR. *EF1* and *L23* were used as standardisation reference genes. In lines E, G, H and M (T0 generation) the inhibition of virus multiplication (a) correlated with a high level of  $Ry_{sto}$  transcript (b).

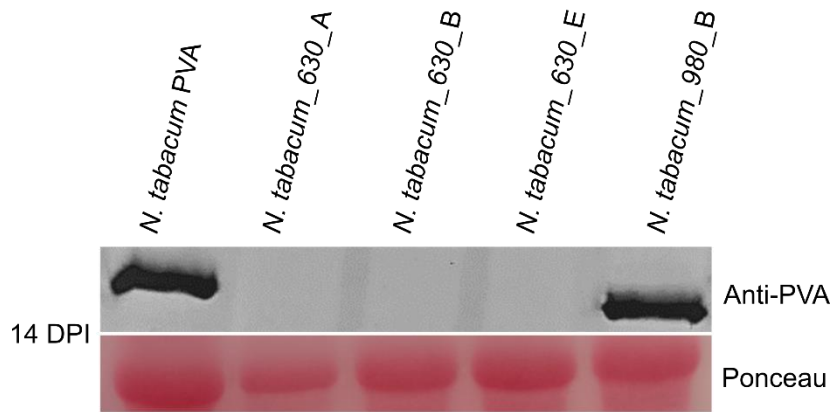

**Supporting Figure 6** *Ry<sub>sto</sub>*-mediated resistance to PVA infection. Western blot analysis of PVA accumulation in leaves of transgenic *Ry<sub>sto</sub>* and non-transformed *N. tabacum* plants after 14 days. Seven-week-old *N. tabacum* *35S:Ry<sub>sto</sub>* or *35:c908B* (control line carrying a non-functional paralogue) and non-transformed plants were inoculated with PVA. Two weeks after infection, samples of upper, non-inoculated leaves were harvested and subjected to immunoblot analysis using alkaline phosphatase-conjugated anti-PVA antibodies.





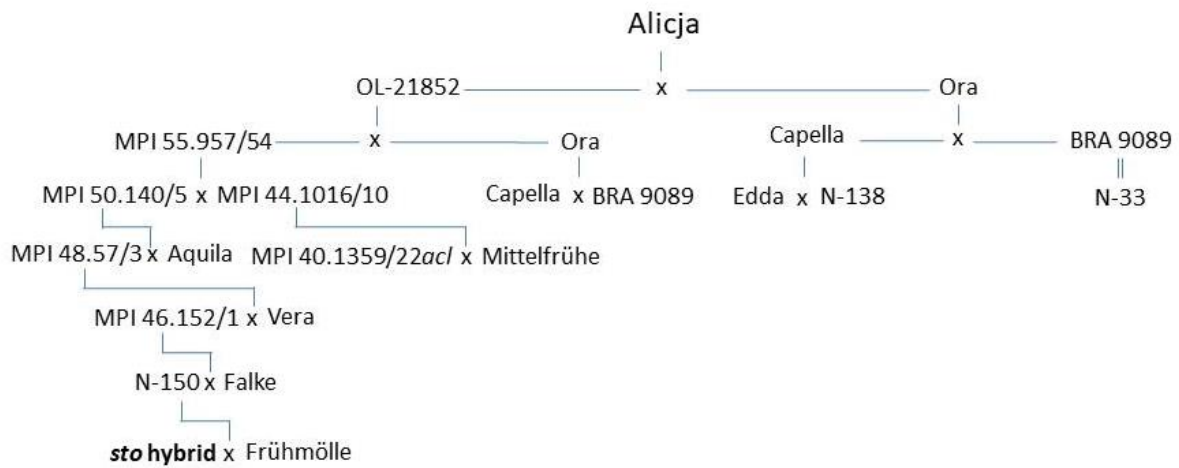

**Supporting Figure 8** Pedigree chart of cultivar Alicja. Cultivar Alicja was obtained from a cross between clone OL-21852 and cultivar Ora at the breeding company HZ Zamarte, Poland. The pedigree chart was prepared according to the data described by Świerzyński *et al.* (1997). The *Ry<sub>sto</sub>* gene source is in bold.

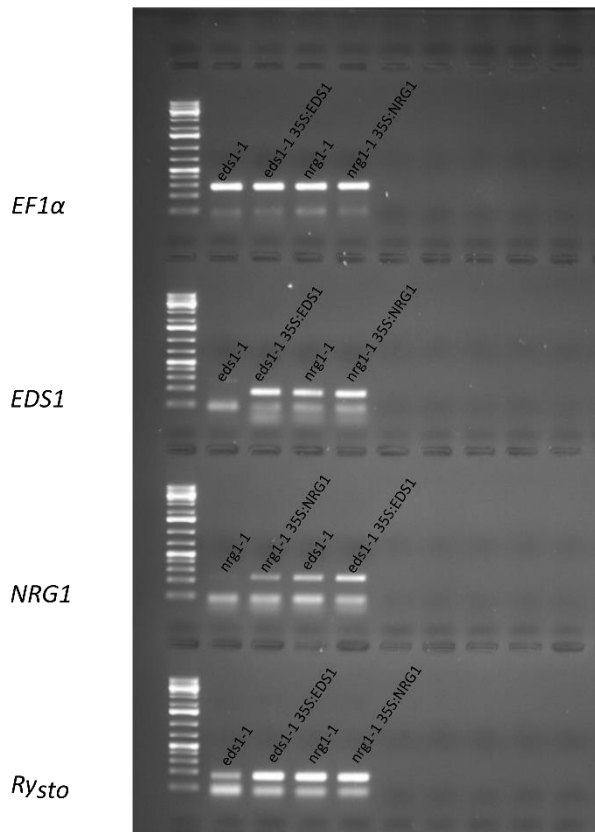

**Supporting Figure 9** Semi-quantitative RT-PCR of *Rysto*, *NRG1* and *EDS1* genes. PVY-infected leaves of *eds1-1*, *nrg1-1* *N. benthamiana* knockout plants were infiltrated with *Agrobacterium* carrying *Rysto* alone or *Rysto* coexpressed with *EDS1* or *NRG1*. Samples were collected two days after infiltration. Elongation factor-1 $\alpha$  (*EF1α*) was used as an internal control.
